# Supplementary material
Source: PubMed Central journal article supplement (PMC3099677)
Supplement: supp_M110.200881_jbc.M110.200881-1.pdf [file supp_M110.200881_jbc.M110.200881-1.pdf]

**Table S1** Clinical-chemical parameters of ADAR2 ko (ko) and control (ct) mice. Data are represented by their mean values  $\pm$  standard error of mean

| Clinical-chemical parameters, 1 <sup>st</sup> sample |                     |                     |                     |                     |         |         |               |         |
|------------------------------------------------------|---------------------|---------------------|---------------------|---------------------|---------|---------|---------------|---------|
| Parameter                                            | ct (A)              |                     | ko (B)              |                     | A~B     | A~B     | ANOVA         |         |
|                                                      | male                | female              | male                | female              | male    | female  | geno-<br>type | sex     |
|                                                      | (n=10)              | (n=9)               | (n=9)               | (n=10)              | p-value | p-value | p-value       | p-value |
| sodium [mmol/l]                                      | 148.8<br>$\pm$ 0.85 | 148.0<br>$\pm$ 0.58 | 147.1<br>$\pm$ 1.11 | 146.6<br>$\pm$ 0.52 | n.s.    | n.s.    | n.s.          | n.s.    |
| potassium [mmol/l]                                   | 5.42<br>$\pm$ 1.51  | 3.96<br>$\pm$ 0.15  | 4.31<br>$\pm$ 0.11  | 3.96<br>$\pm$ 0.12  | n.s.    | n.s.    | n.s.          | n.s.    |
| calcium [mmol/l]                                     | 2.23<br>$\pm$ 0.01  | 2.20<br>$\pm$ 0.02  | 2.19<br>$\pm$ 0.01  | 2.19<br>$\pm$ 0.01  | p<0.05  | n.s.    | n.s.          | n.s.    |
| chloride [mmol/l]                                    | 106.8<br>$\pm$ 1.01 | 109.0<br>$\pm$ 0.68 | 105.0<br>$\pm$ 0.79 | 107.8<br>$\pm$ 0.52 | n.s.    | n.s.    | n.s.          | p<0.01  |
| inorg. phosphorus [mmol/l]                           | 1.62<br>$\pm$ 0.09  | 1.44<br>$\pm$ 0.10  | 1.40<br>$\pm$ 0.06  | 1.36<br>$\pm$ 0.08  | n.s.    | n.s.    | n.s.          | n.s.    |
| total protein [g/dl]                                 | 5.14<br>$\pm$ 0.07  | 5.02<br>$\pm$ 0.09  | 4.87<br>$\pm$ 0.08  | 4.88<br>$\pm$ 0.06  | p<0.05  | n.s.    | p<0.05        | n.s.    |
| albumin [g/dl]                                       | 2.44<br>$\pm$ 0.04  | 2.64<br>$\pm$ 0.04  | 2.33<br>$\pm$ 0.06  | 2.60<br>$\pm$ 0.05  | n.s.    | n.s.    | n.s.          | p<0.001 |
| creatinine [mg/dl]                                   | 0.11<br>$\pm$ 0.013 | 0.12<br>$\pm$ 0.008 | 0.77<br>$\pm$ 0.005 | 0.11<br>$\pm$ 0.005 | n.s.    | n.s.    | n.s.          | n.s.    |
| urea [mg/dl]                                         | 69.0<br>$\pm$ 3.34  | 65.3<br>$\pm$ 2.05  | 63.0<br>$\pm$ 3.17  | 66.4<br>$\pm$ 2.22  | n.s.    | n.s.    | n.s.          | n.s.    |
| Cholesterol [mg/dl]                                  | 131.7<br>$\pm$ 5.39 | 96.3<br>$\pm$ 3.68  | 119.7<br>$\pm$ 5.15 | 91.6<br>$\pm$ 3.09  | n.s.    | n.s.    | n.s.          | p<0.001 |
| triglycerides [mg/dl]                                | 182<br>$\pm$ 21.3   | 94<br>$\pm$ 6.8     | 154<br>$\pm$ 18.2   | 89<br>$\pm$ 7.9     | n.s.    | n.s.    | n.s.          | p<0.001 |
| non-esterified fatty acid [mmol/l]                   | 0.67<br>$\pm$ 0.043 | 0.98<br>$\pm$ 0.036 | 0.77<br>$\pm$ 0.018 | 1.10<br>$\pm$ 0.071 | n.s.    | n.s.    | p<0.05        | p<0.001 |
| LDH [U/l]                                            | 190<br>$\pm$ 22.3   | 221<br>$\pm$ 21.5   | 210<br>$\pm$ 23.5   | 207<br>$\pm$ 16.8   | n.s.    | n.s.    | n.s.          | n.s.    |
| alanin-aminotransferase [U/l]                        | 29.8<br>$\pm$ 1.8   | 30.2<br>$\pm$ 4.1   | 29.8<br>$\pm$ 2.9   | 25.0<br>$\pm$ 1.3   | n.s.    | n.s.    | n.s.          | n.s.    |
| Aspartate-aminotransferase [U/l]                     | 47.6<br>$\pm$ 1.6   | 59.1<br>$\pm$ 5.8   | 48.4<br>$\pm$ 2.8   | 65.2<br>$\pm$ 5.2   | n.s.    | n.s.    | n.s.          | p<0.01  |
| alkaline phosphatase [U/l]                           | 76.4<br>$\pm$ 8.2   | 130.0<br>$\pm$ 6.3  | 93.6<br>$\pm$ 5.0   | 136.4<br>$\pm$ 4.4  | n.s.    | n.s.    | n.s.          | p<0.001 |
| $\alpha$ -amylase [U/l]                              | 558<br>$\pm$ 23.7   | 617<br>$\pm$ 37.8   | 579<br>$\pm$ 40.8   | 614<br>$\pm$ 33.7   | n.s.    | n.s.    | n.s.          | n.s.    |
| glucose [mg/dl]                                      | 194<br>$\pm$ 9.2    | 208<br>$\pm$ 9.4    | 155<br>$\pm$ 8.8    | 192<br>$\pm$ 11.6   | p<0.01  | n.s.    | p<0.01        | p<0.05  |
| ferritin [ng/ml]                                     | 22.1<br>$\pm$ 1.2   | 23.8<br>$\pm$ 1.4   | 23.2<br>$\pm$ 1.7   | 24.8<br>$\pm$ 2.0   | n.s.    | n.s.    | n.s.          | n.s.    |
| transferrin [mg/dl]                                  | 136.8<br>$\pm$ 2.2  | 133.2<br>$\pm$ 1.5  | 138.1<br>$\pm$ 3.2  | 133.7<br>$\pm$ 1.5  | n.s.    | n.s.    | n.s.          | n.s.    |
| iron [ $\mu$ g/dl]                                   | 94.6<br>$\pm$ 9.3   | 110.0<br>$\pm$ 6.6  | 93.4<br>$\pm$ 4.2   | 131.7<br>$\pm$ 8.0  | n.s.    | n.s.    | n.s.          | p<0.001 |

| <b>Clinical-chemical parameters, 2<sup>nd</sup> blood sample of 17 week old mice</b> |                 |                 |                 |                 |        |        |        |         |
|--------------------------------------------------------------------------------------|-----------------|-----------------|-----------------|-----------------|--------|--------|--------|---------|
| calcium [mmol/l]                                                                     | 2.18<br>± 0.02  | 2.15<br>± 0.02  | 2.14<br>± 0.02  | 2.16<br>± 0.01  | n.s.   | n.s.   | n.s.   | n.s.    |
| inorg. phosphorus [mmol/l]                                                           | 1.68<br>± 0.08  | 1.42<br>± 0.06  | 1.40<br>± 0.08  | 1.49<br>± 0.07  | p<0.05 | n.s.   | n.s.   | n.s.    |
| total protein [g/dl]                                                                 | 5.34<br>± 0.07  | 5.16<br>± 0.06  | 5.00<br>± 0.09  | 5.09<br>± 0.06  | p<0.01 | n.s.   | p<0.01 | n.s.    |
| albumin [g/dl]                                                                       | 2.50 ±<br>0.045 | 2.48 ±<br>0.035 | 2.29<br>± 0.048 | 2.49<br>± 0.035 | p<0.01 | n.s.   | p<0.05 | p<0.05  |
| cholesterol [mg/dl]                                                                  | 127.0<br>± 5.5  | 95.5<br>± 4.5   | 127.4<br>± 4.5  | 97.3<br>± 1.5   | n.s.   | n.s.   | n.s.   | p<0.001 |
| triglycerides [mg/dl]                                                                | 171<br>± 18.3   | 88<br>± 8.8     | 195<br>± 19.8   | 99<br>± 9.1     | n.s.   | n.s.   | n.s.   | p<0.001 |
| alkaline phosphatase [U/l]                                                           | 78.4<br>± 3.5   | 132.2 ±<br>4.5  | 83.6<br>± 6.4   | 131.3<br>± 5.8  | n.s.   | n.s.   | n.s.   | p<0.001 |
| glucose [mg/dl]                                                                      | 224<br>± 8.0    | 174<br>± 11.3   | 174<br>± 10.4   | 166<br>± 5.0    | p<0.01 | n.s.   | p<0.01 | p<0.01  |
| <b>Blood lipid and glucose values of fasted mice</b>                                 |                 |                 |                 |                 |        |        |        |         |
| cholesterol [mg/dl]                                                                  | 140.9<br>± 4.83 | 100.1 ±<br>4.34 | 148.9<br>± 6.79 | 104.3<br>± 5.07 | n.s.   | n.s.   | n.s.   | p<0.001 |
| triglycerides [mg/dl]                                                                | 80<br>± 9.0     | 75<br>± 4.8     | 76<br>± 4.1     | 60<br>± 3.6     | n.s.   | p<0.05 | n.s.   | n.s.    |
| non-esterified fatty acid [mmol/l]                                                   | 0.73<br>± 0.044 | 0.95<br>± 0.057 | 0.73<br>± 0.049 | 0.90<br>± 0.071 | n.s.   | n.s.   | n.s.   | p<0.01  |
| Glucose [mg/dl]                                                                      | 189<br>± 17.7   | 156<br>± 18.3   | 173<br>± 23.8   | 162<br>± 16.3   | n.s.   | n.s.   | n.s.   | n.s.    |
| <b>Hematological parameters, 1<sup>st</sup> blood sample</b>                         |                 |                 |                 |                 |        |        |        |         |
| white blood cell count [10 <sup>3</sup> /μl]                                         | 6.0<br>± 0.56   | 6.2<br>± 0.53   | 5.5<br>± 0.37   | 4.4<br>± 0.38   | n.s.   | p<0.05 | p<0.05 | n.s.    |
| red blood cell count [10 <sup>6</sup> /μl]                                           | 9.9<br>± 0.12   | 9.9<br>± 0.14   | 9.7<br>± 0.13   | 10.1<br>± 0.06  | n.s.   | n.s.   | n.s.   | n.s.    |
| platelet count [10 <sup>3</sup> /μl]                                                 | 1055<br>± 59    | 884<br>± 18     | 1010<br>± 41    | 862<br>± 33     | n.s.   | n.s.   | n.s.   | p<0.001 |
| hemoglobin [g/dl]                                                                    | 14.5<br>± 0.19  | 14.6<br>± 0.24  | 14.2<br>± 0.2   | 15.0<br>± 0.10  | n.s.   | n.s.   | n.s.   | p<0.05  |
| hematocrit [%]                                                                       | 45.7<br>± 0.67  | 45.3<br>± 0.75  | 44.7<br>± 0.58  | 46.4<br>± 0.40  | n.s.   | n.s.   | n.s.   | n.s.    |
| mean corpuscular volume [fl]                                                         | 46.1<br>± 0.23  | 45.8<br>± 0.32  | 46.2<br>± 0.22  | 46.0<br>± 0.21  | n.s.   | n.s.   | n.s.   | n.s.    |
| mean corpuscular hemoglobin [pg]                                                     | 14.6<br>± 0.06  | 14.8<br>± 0.11  | 14.7<br>± 0.12  | 14.9<br>± 0.09  | n.s.   | n.s.   | n.s.   | p<0.05  |
| mean corpuscular hemoglobin concentration [g/dl]                                     | 31.6<br>± 0.12  | 32.3<br>± 0.14  | 31.7<br>± 0.14  | 32.4<br>± 0.20  | n.s.   | n.s.   | n.s.   | p<0.001 |
| red blood cell distribution width [% of MCV]                                         | 14.5<br>± 0.11  | 14.2<br>± 0.10  | 14.5<br>± 0.24  | 14.1<br>± 0.10  | n.s.   | n.s.   | n.s.   | p<0.05  |
| mean platelet volume [fl]                                                            | 5.4<br>± 0.16   | 5.1<br>± 0.05   | 5.4<br>± 0.07   | 5.1<br>± 0.05   | n.s.   | n.s.   | n.s.   | p<0.01  |
