# Supplementary material
Source: PubMed Central journal article supplement (PMC3099677)
Supplement: supp_M110.200881_jbc.M110.200881-2.pdf [file supp_M110.200881_jbc.M110.200881-2.pdf]

**Table S2** Immunological parameters of ADAR2 ko and control (ct) mice: Flow Cytometry of leukocyte subsets and Bioplex/ELISA analysis of antibodies of different isotypes

| <b>Flow cytometry [% of CD45+viable leukocytes]</b> |                   |                   |                |                   |                   |                |                |                |
|-----------------------------------------------------|-------------------|-------------------|----------------|-------------------|-------------------|----------------|----------------|----------------|
| <b>Parameter</b>                                    | <b>ct (A)</b>     |                   |                | <b>ko (B)</b>     |                   |                | <b>A ~ B</b>   |                |
|                                                     | <b>male</b>       | <b>female</b>     | <b>p-value</b> | <b>male</b>       | <b>female</b>     | <b>p-value</b> | <b>male</b>    | <b>female</b>  |
|                                                     | <b>(n=10)</b>     | <b>(n=8)</b>      |                | <b>(n=10)</b>     | <b>(n=10)</b>     |                | <b>p-value</b> | <b>p-value</b> |
| T-cells (CD3+)                                      | 18.8<br>± 1.28    | 25.0<br>± 1.40    | p<0.01         | 17.6<br>± 1.01    | 25.4<br>± 1.22    | p<0.001        | n.s.           | n.s.           |
| CD8+ T-cells                                        | 7.87<br>± 0.47    | 11.35<br>± 0.56   | p<0.001        | 7.56<br>± 0.38    | 11.20<br>± 0.50   | p<0.001        | n.s.           | n.s.           |
| CD4+ T-cells                                        | 10.39<br>± 0.87   | 12.99<br>± 0.93   | n.s.           | 9.38<br>± 0.62    | 13.33<br>± 0.83   | p<0.01         | n.s.           | n.s.           |
| gdTCR+ T-cells                                      | 0.3<br>± 0.02     | 0.4<br>± 0.04     | p<0.05         | 0.3<br>± 0.02     | 0.6<br>± 0.07     | p<0.01         | n.s.           | n.s.           |
| CD4+/CD25+                                          | 5.91<br>± 0.37    | 5.11<br>± 0.22    | n.s.           | 5.78<br>± 0.34    | 5.32<br>± 0.25    | n.s.           | n.s.           | n.s.           |
| CD4+/CD44+                                          | 69.75<br>± 0.66   | 72.73<br>± 0.82   | p<0.05         | 71.36<br>± 0.65   | 73.88<br>± 1.17   | n.s.           | n.s.           | n.s.           |
| CD4+/CD62L+                                         | 46.44<br>± 3.27   | 58.32<br>± 4.31   | p<0.05         | 48.51<br>± 3.36   | 58.51<br>± 3.66   | n.s.           | n.s.           | n.s.           |
| CD4+/Ly6C+                                          | 10.6<br>± 0.61    | 6.2<br>± 0.69     | p<0.001        | 10.6<br>± 0.59    | 6.3<br>± 0.47     | p<0.001        | n.s.           | n.s.           |
| CD8+/CD44+                                          | 66.03<br>± 0.85   | 64.01<br>± 1.10   | n.s.           | 64.06<br>± 1.28   | 63.54<br>± 1.34   | n.s.           | n.s.           | n.s.           |
| CD8+/CD62L+                                         | 53.6<br>± 2.16    | 59.9<br>± 4.67    | n.s.           | 54.8<br>± 3.53    | 61.1<br>± 3.83    | n.s.           | n.s.           | n.s.           |
| CD8+/Ly6C+                                          | 35<br>± 1.8       | 25<br>± 2.5       | p<0.01         | 32<br>± 2.0       | 24<br>± 2.0       | p<0.05         | n.s.           | n.s.           |
| ratio4:8                                            | 1.3<br>± 0.06     | 1.1<br>± 0.05     | n.s.           | 1.2<br>± 0.05     | 1.2<br>± 0.07     | n.s.           | n.s.           | n.s.           |
| B-cells (CD19+)                                     | 58.2<br>± 1.66    | 52.4<br>± 1.45    | p<0.05         | 59.0<br>± 1.28    | 49.2<br>± 1.06    | p<0.001        | n.s.           | n.s.           |
| CD19+/IgD                                           | 92.1<br>± 0.46    | 92.5<br>± 0.67    | n.s.           | 93.3<br>± 0.39    | 91.3<br>± 0.98    | n.s.           | n.s.           | n.s.           |
| Granulocytes Gr1+<br>CD11b+                         | 8.9<br>± 0.99     | 9.6<br>± 0.84     | n.s.           | 10.9<br>± 1.51    | 11.4<br>± 1.0     | n.s.           | n.s.           | n.s.           |
| NKT-cells/NK1.1+<br>CD5+                            | 0.14<br>± 0.01    | 0.21<br>± 0.02    | p<0.01         | 0.16<br>± 0.01    | 0.26<br>± 0.03    | p<0.01         | n.s.           | n.s.           |
| NK/NK1.1+/CD5-                                      | 3.6<br>± 0.4      | 4.7<br>± 0.4      | n.s.           | 3.7<br>± 0.2      | 5.4<br>± 0.3      | p<0.001        | n.s.           | n.s.           |
| Monocytes (CD11b+<br>NK1.1 neg.nonGr)               | 6.8<br>± 0.29     | 6.6<br>± 0.44     | n.s.           | 6.8<br>± 0.24     | 6.0<br>± 0.31     | n.s.           | n.s.           | n.s.           |
| <b>Bioplex/ELISA [µl/ml]</b>                        |                   |                   |                |                   |                   |                |                |                |
| IgG1                                                | 386.7<br>± 62.58  | 497.6<br>± 78.85  | n.s.           | 502.8<br>± 151.44 | 704.2<br>± 95.93  | n.s.           | n.s.           | n.s.           |
| IgG2a                                               | 120.18<br>± 14.0  | 164.20<br>± 12.72 | p<0.05         | 115.04<br>± 18.09 | 156.48<br>± 38.66 | n.s.           | n.s.           | n.s.           |
| IgG2b                                               | 457.26<br>± 98.13 | 989.39 ±<br>96.02 | p<0.01         | 430.35<br>± 28.70 | 900.54<br>± 93.94 | p<0.001        | n.s.           | n.s.           |

|                   |                   |                   |        |                    |                   |      |      |      |
|-------------------|-------------------|-------------------|--------|--------------------|-------------------|------|------|------|
| IgG3              | 556.3<br>± 09.67  | 838.0<br>± 129.20 | n.s.   | 552.9<br>± 90.95   | 821.9 ±<br>152.66 | n.s. | n.s. | n.s. |
| IgM               | 339.94<br>± 20.08 | 373.97 ±<br>17.20 | n.s.   | 341.01<br>± 26.4   | 321.46<br>± 30.84 | n.s. | n.s. | n.s. |
| IgA               | 512.62<br>± 61.13 | 974.28 ±<br>02.73 | p<0.01 | 764.01<br>± 128.04 | 786.7<br>± 97.70  | n.s. | n.s. | n.s. |
| Anti-DNA          | 0.377<br>± 0.067  | 0.567<br>± 0.079  | n.s.   | 0.344<br>± 0.016   | 0.420<br>± 0.079  | n.s. | n.s. | n.s. |
| Rheumatoid factor | 0.0<br>± 0.01     | 0.1<br>± 0.08     | n.s.   | 0.0<br>± 0.02      | 0.0<br>± 0.01     | n.s. | n.s. | n.s. |
