# Supplementary material
Source: PubMed Central journal article supplement (PMC3099677)
Supplement: supp_M110.200881_jbc.M110.200881-3.pdf [file supp_M110.200881_jbc.M110.200881-3.pdf]

**Table S3** Results obtained for the measurement of spontaneous breathing pattern of ADAR2 ko (ko) and control (ct) mice. Data are represented as mean  $\pm$  standard error of mean

| <b>Characterization of the mice</b>                     |                     |                     |                |                     |                     |                |                |                |
|---------------------------------------------------------|---------------------|---------------------|----------------|---------------------|---------------------|----------------|----------------|----------------|
| <b>Parameter</b>                                        | <b>ct (A)</b>       |                     |                | <b>ko (B)</b>       |                     |                | <b>A ~ B</b>   |                |
|                                                         | <b>male</b>         | <b>female</b>       | <b>p-value</b> | <b>male</b>         | <b>female</b>       | <b>p-value</b> | <b>male</b>    | <b>female</b>  |
|                                                         | <b>(n=6)</b>        | <b>(n=6)</b>        |                | <b>(n=5)</b>        | <b>(n=6)</b>        |                | <b>p-value</b> | <b>p-value</b> |
| bw [g]                                                  | 31.8<br>$\pm$ 1.4   | 24.8<br>$\pm$ 1.1   | < 0.01         | 34.7<br>$\pm$ 0.3   | 24.1<br>$\pm$ 0.6   | < 0.001        | n.s.           | n.s.           |
| age [d]                                                 | 133.5<br>$\pm$ 0.3  | 133.8<br>$\pm$ 0.5  | n.s.           | 133.2<br>$\pm$ 0.4  | 133.7<br>$\pm$ 0.4  | n.s.           | n.s.           | n.s.           |
| mean_f [1/min]                                          | 446.2<br>$\pm$ 12.9 | 428.4<br>$\pm$ 26.7 | n.s.           | 485.7<br>$\pm$ 10.3 | 458.6<br>$\pm$ 12.7 | n.s.           | n.s.           | n.s.           |
| <b>Respiratory rate and timing at rest and activity</b> |                     |                     |                |                     |                     |                |                |                |
| <b>Rest</b>                                             |                     |                     |                |                     |                     |                |                |                |
| f [1/min]                                               | 362.3<br>$\pm$ 12.5 | 363.8<br>$\pm$ 11.6 | n.s.           | 390.4<br>$\pm$ 2.7  | 372.2<br>$\pm$ 10.8 | n.s.           | n.s.           | n.s.           |
| Ti [ms]                                                 | 54.0<br>$\pm$ 0.7   | 47.5<br>$\pm$ 1.3   | < 0.01         | 48.4<br>$\pm$ 1.0   | 46.4<br>$\pm$ 1.5   | n.s.           | < 0.01         | n.s.           |
| Te [ms]                                                 | 112.6<br>$\pm$ 5.2  | 118.2<br>$\pm$ 4.2  | n.s.           | 105.3<br>$\pm$ 1.2  | 115.5<br>$\pm$ 4.2  | n.s.           | n.s.           | n.s.           |
| Ti/TT                                                   | 0.33<br>$\pm$ 0.01  | 0.29<br>$\pm$ 0.00  | < 0.01         | 0.32<br>$\pm$ 0.01  | 0.29<br>$\pm$ 0.01  | < 0.05         | n.s.           | n.s.           |
| <b>Activity</b>                                         |                     |                     |                |                     |                     |                |                |                |
| f [1/min]                                               | 474.3<br>$\pm$ 9.2  | 476.3<br>$\pm$ 11.4 | n.s.           | 494.6<br>$\pm$ 7.1  | 492.4<br>$\pm$ 3.9  | n.s.           | n.s.           | n.s.           |
| Ti [ms]                                                 | 45.0<br>$\pm$ 0.7   | 40.9<br>$\pm$ 0.5   | < 0.01         | 42.0<br>$\pm$ 0.6   | 39.9<br>$\pm$ 0.7   | n.s.           | < 0.02         | n.s.           |
| Te [ms]                                                 | 81.8<br>$\pm$ 2.0   | 85.4<br>$\pm$ 2.9   | n.s.           | 79.4<br>$\pm$ 1.8   | 82.0<br>$\pm$ 0.8   | n.s.           | n.s.           | n.s.           |
| Ti/TT                                                   | 0.35<br>$\pm$ 0.01  | 0.32<br>$\pm$ 0.01  | < 0.01         | 0.35<br>$\pm$ 0.01  | 0.33<br>$\pm$ 0.00  | n.s.           | n.s.           | n.s.           |
| <b>Tidal volume and flow rates at rest and activity</b> |                     |                     |                |                     |                     |                |                |                |
| <b>Rest</b>                                             |                     |                     |                |                     |                     |                |                |                |
| TV [ml]                                                 | 0.26<br>$\pm$ 0.02  | 0.21<br>$\pm$ 0.00  | < 0.01         | 0.26<br>$\pm$ 0.02  | 0.20<br>$\pm$ 0.01  | < 0.05         | n.s.           | n.s.           |
| PIF [ml/s]                                              | 8.1<br>$\pm$ 0.5    | 7.5<br>$\pm$ 0.3    | n.s.           | 8.9<br>$\pm$ 0.5    | 7.2<br>$\pm$ 0.4    | < 0.05         | n.s.           | n.s.           |
| PEF [ml/s]                                              | 4.9<br>$\pm$ 0.4    | 4.0<br>$\pm$ 0.2    | n.s.           | 5.1<br>$\pm$ 0.3    | 3.8<br>$\pm$ 0.2    | < 0.01         | n.s.           | n.s.           |
| MIF [ml/s]                                              | 4.9<br>$\pm$ 0.3    | 4.5<br>$\pm$ 0.1    | n.s.           | 5.3<br>$\pm$ 0.3    | 4.2<br>$\pm$ 0.3    | < 0.05         | n.s.           | n.s.           |
| MEF [ml/s]                                              | 2.4<br>$\pm$ 0.2    | 1.8<br>$\pm$ 0.1    | < 0.02         | 2.4<br>$\pm$ 0.2    | 1.7<br>$\pm$ 0.2    | < 0.05         | n.s.           | n.s.           |

| <b>Activity</b>                                                                        |                |                |        |                |                |        |      |      |
|----------------------------------------------------------------------------------------|----------------|----------------|--------|----------------|----------------|--------|------|------|
| TV [ml]                                                                                | 0.28<br>± 0.01 | 0.22<br>± 0.01 | < 0.01 | 0.27 ±<br>0.01 | 0.21 ±<br>0.01 | < 0.01 | n.s. | n.s. |
| PIF [ml/s]                                                                             | 9.9<br>± 0.5   | 8.6<br>± 0.3   | n.s.   | 10.5<br>± 0.5  | 8.6<br>± 0.4   | < 0.01 | n.s. | n.s. |
| PEF [ml/s]                                                                             | 6.8<br>± 0.5   | 5.3<br>± 0.3   | < 0.02 | 6.9<br>± 0.4   | 5.3<br>± 0.2   | < 0.01 | n.s. | n.s. |
| MIF [ml/s]                                                                             | 6.1<br>± 0.3   | 5.3<br>± 0.2   | < 0.05 | 6.4<br>± 0.3   | 5.2<br>± 0.2   | < 0.01 | n.s. | n.s. |
| MEF [ml/s]                                                                             | 3.4<br>± 0.2   | 2.5<br>± 0.1   | < 0.01 | 3.4<br>± 0.2   | 2.5<br>± 0.1   | < 0.01 | n.s. | n.s. |
| <b>Minute ventilation and body size/weight related parameters at rest and activity</b> |                |                |        |                |                |        |      |      |
| <b>Rest</b>                                                                            |                |                |        |                |                |        |      |      |
| sTV [ $\mu$ l/g]                                                                       | 8.4<br>± 0.5   | 8.6<br>± 0.4   | n.s.   | 7.5<br>± 0.6   | 8.1<br>± 0.6   | n.s.   | n.s. | n.s. |
| MV [ml/min]                                                                            | 93.4<br>± 7.1  | 74.5<br>± 3.2  | n.s.   | 97.7<br>± 7.7  | 71.6<br>± 6.1  | < 0.05 | n.s. | n.s. |
| sMV [ml/min/g]                                                                         | 3.0<br>± 0.3   | 3.1<br>± 0.2   | n.s.   | 2.8<br>± 0.2   | 3.0<br>± 0.3   | n.s.   | n.s. | n.s. |
| <b>Activity</b>                                                                        |                |                |        |                |                |        |      |      |
| sTV [ $\mu$ l/g]                                                                       | 8.8<br>± 0.6   | 8.8<br>± 0.6   | n.s.   | 7.7<br>± 0.4   | 8.6<br>± 0.5   | n.s.   | n.s. | n.s. |
| MV [ml/min]                                                                            | 130.0<br>± 7.6 | 101.5<br>± 5.0 | < 0.02 | 130.8<br>± 8.0 | 100.7<br>± 5.1 | < 0.01 | n.s. | n.s. |
| sMV [ml/min/g]                                                                         | 4.1<br>± 0.3   | 4.2<br>± 0.4   | n.s.   | 3.8<br>± 0.2   | 4.2<br>± 0.2   | n.s.   | n.s. | n.s. |

#### Abbreviations

|        |                                       |
|--------|---------------------------------------|
| bw     | body weight (g)                       |
| mean_f | mean of all respiratory rates (1/min) |
| f      | respiratory rate (1/min)              |
| TV     | tidal volume (ml)                     |
| sTV    | specific tidal volume ( $\mu$ l/g)    |
| MV     | minute ventilation (ml/min)           |
| sMV    | specific ventilation (ml/min/g)       |
| Ti     | inspiratory time (ms)                 |
| Te     | expiratory time (ms)                  |
| Ti/TT  | relative duration of inspiration      |
| PIF    | peak inspiratory flow rate (ml/s)     |
| PEF    | peak expiratory flow rate (ml/s)      |
| MIF    | mean inspiratory flow rate (ml/s)     |
| MEF    | mean expiratory flow rate (ml/s)      |
