# Supplementary material
Source: PubMed Central journal article supplement (PMC3099677)
Supplement: supp_M110.200881_jbc.M110.200881-4.pdf [file supp_M110.200881_jbc.M110.200881-4.pdf]

**Table S4:** Extent of A-to-I editing at select sites in absence of ADAR2

| Editing sites | Control | ADAR2 KO |
|---------------|---------|----------|
| <i>Cyfp2</i>  |         |          |
| <u>A</u> AG   | 84      | 12       |
| <i>Kcna1</i>  |         |          |
| ATT           | 39      | <5       |
| <i>Bicap</i>  |         |          |
| TAT           | 51      | 53*      |
| <u>C</u> AG   | 34      | 38*      |
| AAG           | 13      | <5       |
| <u>A</u> AG   | 20      | 20*      |
| <i>Gabra3</i> |         |          |
| AT <u>A</u>   | 98      | 39       |
| <i>Flna</i>   |         |          |
| C <u>A</u> G  | 50      | 0        |
| <i>Cadp2</i>  |         |          |
| G <u>A</u> G  | 20      | 10       |
| <i>Flnb</i>   |         |          |
| C <u>A</u> G  | 35      | <5       |

A-to-I edited positions within codons are underlined. The analyzed codons are select examples from the DARNED database (<http://darned.ucc.ie/cite.html>) of edited human genes. Appropriate RT-PCR primers (see Methods) were constructed for the cognate mouse genes. \* no ADAR2 participation.
